# Supplementary material for: Environmental, individual and social traits of free-ranging raccoons influence performance in cognitive testing
Source: Oxford University Press journal article supplement (doi:10.1242/jeb.243726), 2022-09-15
Supplement: jeb243726supp.pdf [file jeb243726supp.pdf]

## **Supplementary Materials and Methods.** Additional methods and results.

### **Animal trapping and detection**

We set up camera traps in locations where we expected raccoons to be present (e.g. proximity to water and vegetation) or where Laramie residents had reported seeing raccoons in the past. This included city parks and public spaces, as well as private property (e.g. residential backyards, local businesses) that we gained permission to access. We subsequently trapped sites with confirmed raccoon presence using Tomahawk live traps (81.28×25.4×25.4 cm, length×width×height) baited with wet cat food. Our general goal was to trap all resident raccoons in Laramie, including juveniles born each year, however priority was given to trapping sites on the West side of Laramie where we believe the highest density of raccoons to be and therefore planned to conduct our cognitive experiments.

Trapping and testing was conducted annually between the months of May and October. In 2018, trapping occurred before testing began, whereas in 2019 testing occurred before and after trapping. In addition, because we did not have access to one of our study sites in 2018, it had not been trapped since 2017. The time between trapping and testing, therefore, varied among individuals tested at different sites in different years. Specifically, some individuals first encountered the testing device shortly after trapping ended (min.=6 days), whereas others experienced a much longer duration between trapping and testing (max.=655). We suspected that active trapping efforts could have made raccoons in the area to be more risk-adverse, and therefore variation in the time between trapping and testing could have influenced whether raccoons habituated to the device or not. When plotted, however, no clear pattern was found between habituation (0, 1) and the time since trapping (days). Thus, we are confident that our trapping protocol did not affect habituation to the testing device.

### **Note regarding striped skunks**

Skunks were opportunistically trapped and marked under the same permits used for our research on raccoons (University of Wyoming Institutional Animal Care and Use Committee: no. 20180813SB00321-02; Wyoming Game and Fish Department Chapter 33 Permit ID: 1019). Thus, free-ranging, PIT-tagged skunks within our study sites ( $n=14$ ) could be detected by the testing device and participate in testing. We detected a total for four skunks during the experiment, one of whom learned to operate the testing device and completed serial reversals. Although reversal learning data from skunks is not included in the present study, our observations of free-ranging skunks during field testing, paired with our testing of skunks in captive conditions (Stanton et al., 2021), suggests that the methodology outlined here can be used with multiple, mesocarnivore species in both natural and captive testing conditions.

### Notable differences in captive versus natural conditions

Wild raccoons tested in captivity were all classified as adults at the time of trapping. They were tested once a night while alone in their home enclosure, and testing sessions lasted for 30 to 90 min. Individuals varied in their prior experience with the cognitive testing device, which likely influenced the number of errors being made initially but not across time (discussed in Stanton et al., 2021). Free-ranging raccoons, which constituted a mix of adults and juveniles, were able to start and stop testing at any point during a testing night, and they may have been subject to interruptions and/or social interference during testing. For these reasons we identified reversal events that were split between testing nights for free-ranging raccoons (e.g. started a reversal during one testing night but completed the reversal on a subsequent testing night) so that we could identify the effect of prolonged gaps in time (i.e. breaks) on performance. We also did not include data from natural conditions where high social interference may have affected the selections being made within the device. Similarly, if an individual experienced high social interference in the majority of their testing nights they were not included in the dataset ( $n=7$ ). Lastly, captive testing was delivered in blocks of 10 selections, such that an individual was required to achieve nine out of 10 selections correct within a block. If not, then a new block of 10 selections was initiated. However, selections in wild conditions were not grouped into blocks and we instead used a sliding window format, in which the raccoon was required to make nine correct selections within 10 consecutive selections.

**Table S1. Standardized points during the four phases of trapping when observations of raccoon behavior (i.e. vocalizations, movement, contact with humans) were made**

| Phase and observation points                                                                                                                                                                                                                                                                                                                                                                                                                                              |
|---------------------------------------------------------------------------------------------------------------------------------------------------------------------------------------------------------------------------------------------------------------------------------------------------------------------------------------------------------------------------------------------------------------------------------------------------------------------------|
| <b>Phase 1 – Capture</b> <ul style="list-style-type: none"><li>• Behavior when human first sees animal in trap</li><li>• Behavior when human first stands next to trap at capture site</li><li>• Behavior when human lifts trap cover and flags trap at capture site</li><li>• Behavior when human moves trap from capture site to truck</li><li>• Behavior when human moves trap from truck to injection site</li><li>• Behavior when human removes trap cover</li></ul> |
| <b>Phase 2 – Immobilization</b> <ul style="list-style-type: none"><li>• Behavior when human approaches trap for injection</li><li>• Behavior when human probes raccoon with capped needle prior to injection</li><li>• Behavior when human injects raccoon with needle</li></ul>                                                                                                                                                                                          |
| <b>Phase 3 – Feeding</b> <ul style="list-style-type: none"><li>• Behavior when human first sees animal in trap after recovery</li><li>• Behavior when human approaches trap and inserts cage divider</li><li>• Behavior to human opening trap and placing food and water in cage, shut door, and remove cage divider</li></ul>                                                                                                                                            |
| <b>Phase 4 – Release</b> <ul style="list-style-type: none"><li>• Behavior when human first sees animal in trap</li><li>• Behavior when human first stands next to trap</li><li>• Behavior when human moves trap from recovery site to truck</li><li>• Behavior when human moves trap from truck to release site</li><li>• Behavior when human puts trap on ground prior to opening door</li><li>• Behavior when human opens trap door at release site</li></ul>           |

**Table S2. Model summary for the effects of age and sex on several biological and behavioral traits**

|                                                     | Type                | N   | R <sup>2</sup> | P-value  | lower CI     | upper CI    | Beta     | t-value |
|-----------------------------------------------------|---------------------|-----|----------------|----------|--------------|-------------|----------|---------|
| Model – Body condition score                        |                     |     |                |          |              |             |          |         |
| BCS ~ Age*Sex                                       | GLM (Gaussian)      | 204 | 0.13           |          |              |             |          |         |
| Age-juvenile                                        |                     |     |                | 1.90e-06 | -0.133497969 | -0.05730414 | -0.09540 | -4.908  |
| Sex-male                                            |                     |     |                | 0.0101   | -0.100235853 | -0.01403327 | -0.05713 | -2.598  |
| Age-juvenile:Sex-male                               |                     |     |                | 0.0316   | 0.005316034  | 0.10703337  | 0.05617  | 2.165   |
| Model – Trappability                                |                     |     |                |          |              |             |          |         |
| Trappability score ~ Age*Sex                        | GLM (quasibinomial) | 182 | 0.03           |          |              |             |          |         |
| Age-juvenile                                        |                     |     |                | 0.347    | -0.4993908   | 0.1837688   | -0.1640  | -0.943  |
| Sex-male                                            |                     |     |                | 0.391    | -0.1993357   | 0.5252940   | 0.1587   | 0.860   |
| Age-juvenile:Sex-male                               |                     |     |                | 0.615    | -0.3280522   | 0.5481791   | 0.1125   | 0.504   |
| Model – Docility                                    |                     |     |                |          |              |             |          |         |
| Vocalization ~ Age*Sex                              | CLM (ordered)       | 178 | NA             |          |              |             |          |         |
| Age-juvenile                                        |                     |     |                | 0.4628   | -0.5166814   | 1.153186    | 0.3117   | 0.734   |
| Sex-male                                            |                     |     |                | 0.1022   | -0.1476393   | 1.687459    | 0.7627   | 1.634   |
| Age-juvenile:Sex-male                               |                     |     |                | 0.0809   | -2.1263523   | 0.117982    | -0.9977  | -1.746  |
| <i>Hosmer-Lemeshow goodness-of-fit test: P=0.36</i> |                     |     |                |          |              |             |          |         |
| Model – Sociality                                   |                     |     |                |          |              |             |          |         |
| Alone ~ Age*Sex                                     | GLM (binomial)      | 40  | 0.17           |          |              |             |          |         |
| Age-juvenile                                        |                     |     |                | 0.0258   | -3.9005200   | -0.3305036  | -1.9924  | -2.229  |
| Sex-male                                            |                     |     |                | 0.4254   | -3.1526623   | 1.4290430   | -0.8938  | -0.797  |
| Age-juvenile:Sex-male                               |                     |     |                | 0.5405   | -2.0496705   | 3.7828333   | 0.8938   | 0.612   |

**Table S3. Repeatability across trapping phases and years**

| Across trapping phases (i.e. within a trapping event):                                                                                                                          | <i>P</i> -value | lower CI    | upper CI    | Beta      | <i>z</i> -value |
|---------------------------------------------------------------------------------------------------------------------------------------------------------------------------------|-----------------|-------------|-------------|-----------|-----------------|
| Model (Cumulative Link Mixed Model fitted with the Laplace approximation)                                                                                                       |                 |             |             |           |                 |
| Vocalization Score ~ Testing Phase + (1 Animal ID)                                                                                                                              |                 |             |             |           |                 |
| Phase2_Immobilization                                                                                                                                                           | 2e-16           | 1.966033    | 3.164286    | 2.5652    | 8.392           |
| Phase3_Feeding                                                                                                                                                                  | 5.71e-10        | 1.270956    | 2.446464    | 1.8587    | 6.198           |
| Phase4_Release                                                                                                                                                                  | 2.80e-08        | 1.046816    | 2.188757    | 1.6178    | 5.553           |
| ICC=Intercept <sup>2</sup> / (Intercept <sup>2</sup> + Residual <sup>2</sup> ):<br>3.733853 <sup>2</sup> /(3.733853 <sup>2</sup> +3.289868 <sup>2</sup> )=0.5629606             |                 |             |             |           |                 |
| Movement Score ~ Testing Phase + (1 Animal ID)                                                                                                                                  |                 |             |             |           |                 |
| Phase2_Immobilization                                                                                                                                                           | 0.000793        | -1.2683350  | -0.33291619 | -0.8006   | -3.355          |
| Phase3_Feeding                                                                                                                                                                  | 0.066440        | -0.8684571  | 0.02849198  | -0.4200   | -1.835          |
| Phase4_Release                                                                                                                                                                  | 1.24e-08        | 0.8571170   | 1.75698505  | 1.3071    | 5.694           |
| ICC=Intercept <sup>2</sup> / (Intercept <sup>2</sup> + Residual <sup>2</sup> ):<br>0.7397941 <sup>2</sup> /(0.7397941 <sup>2</sup> +3.289868 <sup>2</sup> )=0.0481328           |                 |             |             |           |                 |
| Across trapping years (i.e. across trapping events):                                                                                                                            | <i>P</i> -value | lower CI    | upper CI    | Beta      | <i>z</i> -value |
| Model (Cumulative Link Mixed Model fitted with the Laplace approximation)                                                                                                       |                 |             |             |           |                 |
| Vocalization Score ~ Trapping year + (1 Animal ID)                                                                                                                              |                 |             |             |           |                 |
| Trapping2                                                                                                                                                                       | 0.489           | -0.8754376  | 1.8313787   | 0.4780    | 0.692           |
| ICC=Intercept <sup>2</sup> / (Intercept <sup>2</sup> + Residual <sup>2</sup> ):<br>15.68937 <sup>2</sup> /(15.68937 <sup>2</sup> +3.289868 <sup>2</sup> )=0.9578829             |                 |             |             |           |                 |
| Movement Score ~ Trapping year + (1 Animal ID)                                                                                                                                  |                 |             |             |           |                 |
| Trapping2                                                                                                                                                                       | 0.879           | -1.2323855  | 1.0548095   | -0.08879  | -0.152          |
| ICC=Intercept <sup>2</sup> / (Intercept <sup>2</sup> + Residual <sup>2</sup> ):<br>0.4322022 <sup>2</sup> /(0.4322022 <sup>2</sup> +3.289868 <sup>2</sup> )=0.01696623          |                 |             |             |           |                 |
| Contact Score ~ Trapping year + (1 Animal ID)                                                                                                                                   |                 |             |             |           |                 |
| Trapping2                                                                                                                                                                       | 0.51            | -1.7733538  | 3.569532    | 0.8981    | 0.659           |
| ICC=Intercept <sup>2</sup> / (Intercept <sup>2</sup> + Residual <sup>2</sup> ):<br>1.800755 <sup>2</sup> /(1.800755 <sup>2</sup> +3.289868 <sup>2</sup> )=0.2305368             |                 |             |             |           |                 |
|                                                                                                                                                                                 | <i>P</i> -value | lower CI    | upper CI    | Beta      | <i>t</i> -value |
| Model (Linear mixed model fit by REML)                                                                                                                                          |                 |             |             |           |                 |
| Trappability score ~ Trapping year + (1 Animal ID)                                                                                                                              |                 |             |             |           |                 |
| Trapping2                                                                                                                                                                       | 0.000599        | -0.05237997 | -0.01660210 | -0.034491 | -3.836          |
| ICC=Intercept <sup>2</sup> / (Intercept <sup>2</sup> + Residual <sup>2</sup> ):<br>0.0002763574 <sup>2</sup> /(0.0002763574 <sup>2</sup> +0.001253317 <sup>2</sup> )=0.04636625 |                 |             |             |           |                 |
| Trappability score ~ Trapping year + Age*Sex + (1 Animal ID)                                                                                                                    |                 |             |             |           |                 |
| Trapping2                                                                                                                                                                       | 0.00139         | -0.05341176 | -0.01491103 | -0.034275 | -3.429          |
| Trapping3                                                                                                                                                                       | 0.00198         | -0.09272151 | -0.02331963 | -0.058523 | -3.246          |
| Age-juvenile                                                                                                                                                                    | 0.82481         | -0.02764886 | 0.02225475  | -0.002856 | -0.222          |
| Sex-male                                                                                                                                                                        | 0.71031         | -0.02095081 | 0.03007033  | 0.004928  | 0.374           |
| Age-juvenile:Sex-male                                                                                                                                                           | 0.64057         | -0.03364403 | 0.05249216  | 0.010242  | 0.469           |

**Table S4. Results of individual models from natural conditions and captive conditions (reproduced from Stanton et al., 2021). Note that cells lacking data indicate models that could not be calculated due to data limitations.**

| AID                      | Species | Model (Poisson GLM)            | P-value  | lower CI    | upper CI     | Beta      | d.f. | z-value  | R <sup>2</sup> |
|--------------------------|---------|--------------------------------|----------|-------------|--------------|-----------|------|----------|----------------|
| <i>Natural Condition</i> |         |                                |          |             |              |           |      |          |                |
| Allspice                 | Raccoon | Error ~ Reversal Number        | 0.000313 | -0.1002505  | -0.02979731  | -0.06469  | 14   | -3.604   | 0.14           |
| Allspice                 | Raccoon | Error ~ Reversal Number + Side | 0.012448 | -0.74827235 | -0.09326059  | -0.41669  | 13   | -2.499   | 0.20           |
| Caper                    | Raccoon | Error ~ Reversal Number        | 0.90     | -0.175318   | 0.1539761    | -0.01050  | 4    | -0.125   | 0.005          |
| Caper                    | Raccoon | Error ~ Reversal Number + Side | 0.92     | -0.6532777  | 0.5501225    | -0.03077  | 4    | -0.101   | 0.004          |
| Chia                     | Raccoon | Error ~ Reversal Number        | 0.000259 | 0.2503498   | 0.26641278   | -0.03135  | 25   | -3.653   | 0.22           |
| Chia                     | Raccoon | Error ~ Reversal Number + Side | 0.953099 | -0.2503498  | 0.26641278   | 0.007743  | 24   | 0.059    | 0.22           |
| Chive                    | Raccoon | Error ~ Reversal Number        | 0.119    | -0.07121936 | 0.007951245  | -0.03140  | 15   | -1.558   | 0.05           |
| Chive                    | Raccoon | Error ~ Reversal Number + Side | 0.573    | -0.27407842 | 0.50241236   | 0.11127   | 14   | 0.564    | 0.05           |
| Coco                     | Raccoon | Error ~ Reversal Number        | 0.0248   | -0.0416705  | -0.002889005 | -0.022172 | 26   | -2.244   | 0.07           |
| Coco                     | Raccoon | Error ~ Reversal Number + Side | 0.9322   | -0.32435160 | 0.297415588  | -0.013461 | 25   | -0.085   | 0.07           |
| Okefenoke                | Raccoon | Error ~ Reversal Number        | 0.0681   | -0.03761509 | 0.00129984   | -0.018097 | 21   | -1.824   | 0.03           |
| Okefenoke                | Raccoon | Error ~ Reversal Number + Side | 0.1368   | -0.06126938 | 0.45832968   | 0.196937  | 20   | 1.488    | 0.05           |
| Primrose                 | Raccoon | Error ~ Reversal Number        | 0.586    | -0.07725152 | 0.1375734    | 0.02979   | 6    | 0.545    | 0.02           |
| Primrose                 | Raccoon | Error ~ Reversal Number + Side | 0.021    | 0.12797689  | 1.294357     | 0.68135   | 5    | 2.307    | 0.4            |
| Tarragon                 | Raccoon | Error ~ Reversal Number        | 0.684    | -0.07447412 | 0.1138773    | 0.01951   | 6    | 0.407    | 0.006          |
| Tarragon                 | Raccoon | Error ~ Reversal Number + Side | 0.000319 | -1.63090947 | -0.4988743   | -1.03183  | 5    | -3.600   | .59            |
| Tombigbee                | Raccoon | Error ~ Reversal Number        | 0.359    | -0.03609974 | 0.1003113    | 0.03186   | 8    | 0.917    | 0.007          |
| Tombigbee                | Raccoon | Error ~ Reversal Number + Side | 3.63e-11 | -4.08943445 | -2.2470621   | -3.04527  | 7    | -6.619   | 0.90           |
| Voyageurs                | Raccoon | Error ~ Reversal Number        | 0.196    | -0.8969634  | 0.1698147    | -0.3477   | 1    | -1.293   | 0.64           |
| Voyageurs                | Raccoon | Error ~ Reversal Number + Side | -        | -           | -            | -         | -    | -        | -              |
| <i>Captive Condition</i> |         |                                |          |             |              |           |      |          |                |
| Vega                     | Raccoon | Error ~ Reversal Number        | 3.76E-05 | -0.05833    | -0.02084     | -0.03936  | 30   | -4.12153 | 0.320028       |
| Vega                     | Raccoon | Error ~ Reversal Number + Side | 0.097243 | -0.05013    | 0.622547     | 0.283916  | 29   | 0.097243 | 0.370285       |
| Pollux                   | Raccoon | Error ~ Reversal Number        | 3.24E-06 | -0.05743    | -0.02348     | -0.04027  | 30   | -4.65468 | 0.324268       |

| AID    | Species | Model (Poisson GLM)            | P-value  | lower CI | upper CI | Beta     | d.f. | z-value  | R <sup>2</sup> |
|--------|---------|--------------------------------|----------|----------|----------|----------|------|----------|----------------|
| Pollux | Raccoon | Error ~ Reversal Number + Side | 0.383205 | -0.43662 | 0.1698   | -0.13465 | 29   | 0.383205 | 0.33515        |
| Rigel  | Raccoon | Error ~ Reversal Number        | 7.52E-05 | -0.11835 | -0.04034 | -0.0786  | 18   | -3.95933 | 0.363819       |
| Rigel  | Raccoon | Error ~ Reversal Number + Side | 0.004783 | 0.193569 | 1.059276 | 0.620657 | 17   | 0.004783 | 0.541853       |
| Sirius | Raccoon | Error ~ Reversal Number        | 0.00045  | -0.07276 | -0.02075 | -0.04648 | 21   | -3.50888 | 0.309757       |
| Sirius | Raccoon | Error ~ Reversal Number + Side | 0.183774 | -0.10804 | 0.583329 | 0.233878 | 20   | 0.183774 | 0.353527       |
| Oberon | Raccoon | Error ~ Reversal Number        | 1.15E-05 | -0.04929 | -0.0189  | -0.034   | 26   | -4.38788 | 0.261329       |
| Oberon | Raccoon | Error ~ Reversal Number + Side | 0.586995 | -0.17394 | 0.310216 | 0.067008 | 25   | 0.586995 | 0.265255       |
| Astrid | Raccoon | Error ~ Reversal Number        | 0.006162 | -0.10381 | -0.01741 | -0.06029 | 11   | -2.73905 | 0.221065       |
| Astrid | Raccoon | Error ~ Reversal Number + Side | 0.250413 | -0.13142 | 0.517668 | 0.189896 | 10   | 0.250413 | 0.259792       |
| Castor | Raccoon | Error ~ Reversal Number        | 7.43E-15 | -0.08426 | -0.05042 | -0.06707 | 29   | -7.77688 | 0.392246       |
| Castor | Raccoon | Error ~ Reversal Number + Side | 0.001128 | 0.18844  | 0.751212 | 0.466755 | 28   | 0.001128 | 0.456132       |
| Luna   | Raccoon | Error ~ Reversal Number        | -        | -        | -        | -        | -    | -        | -              |
| Luna   | Raccoon | Error ~ Reversal Number + Side | -        | -        | -        | -        | -    | -        | -              |

**Table S5. Summary table for captive versus natural testing conditions**

| Model (Poisson GLMM w/ log link)                 | P-value | lower CI     | upper CI    | Beta      | z-value |
|--------------------------------------------------|---------|--------------|-------------|-----------|---------|
| <i>All individuals</i>                           |         |              |             |           |         |
| Errors~Reversal*Condition+(1 + Test   Animal ID) |         |              |             |           |         |
| $R^2=0.67, d.f.=322$                             |         |              |             |           |         |
| (Intercept)                                      | < 2e-16 | 2.206773424  | 2.60344750  | 2.410069  | 25.184  |
| Reversal                                         | < 2e-16 | -0.060474603 | -0.03791021 | -0.048339 | -9.307  |
| ConditionNatural                                 | 0.46246 | -0.362887765 | 0.17420840  | -0.095314 | -0.735  |
| Reversal:ConditionNatural                        | 0.00437 | 0.006659671  | 0.04111761  | 0.022674  | 2.850   |
| <i>Adults only</i>                               |         |              |             |           |         |
| Errors~Reversal*Condition+(1 + Test   Animal ID) |         |              |             |           |         |
| $R^2=0.71, d.f.=231$                             |         |              |             |           |         |
| (Intercept)                                      | <2e-16  | 2.190584725  | 2.61736705  | 2.411200  | 24.202  |
| Test                                             | <2e-16  | -0.062001121 | -0.03782622 | -0.048766 | -8.960  |
| ConditionNatural                                 | 0.1740  | -0.676581780 | 0.15644441  | -0.266346 | -1.359  |
| Test:ConditionNatural                            | 0.0195  | 0.004615396  | 0.05764457  | 0.028737  | 2.336   |



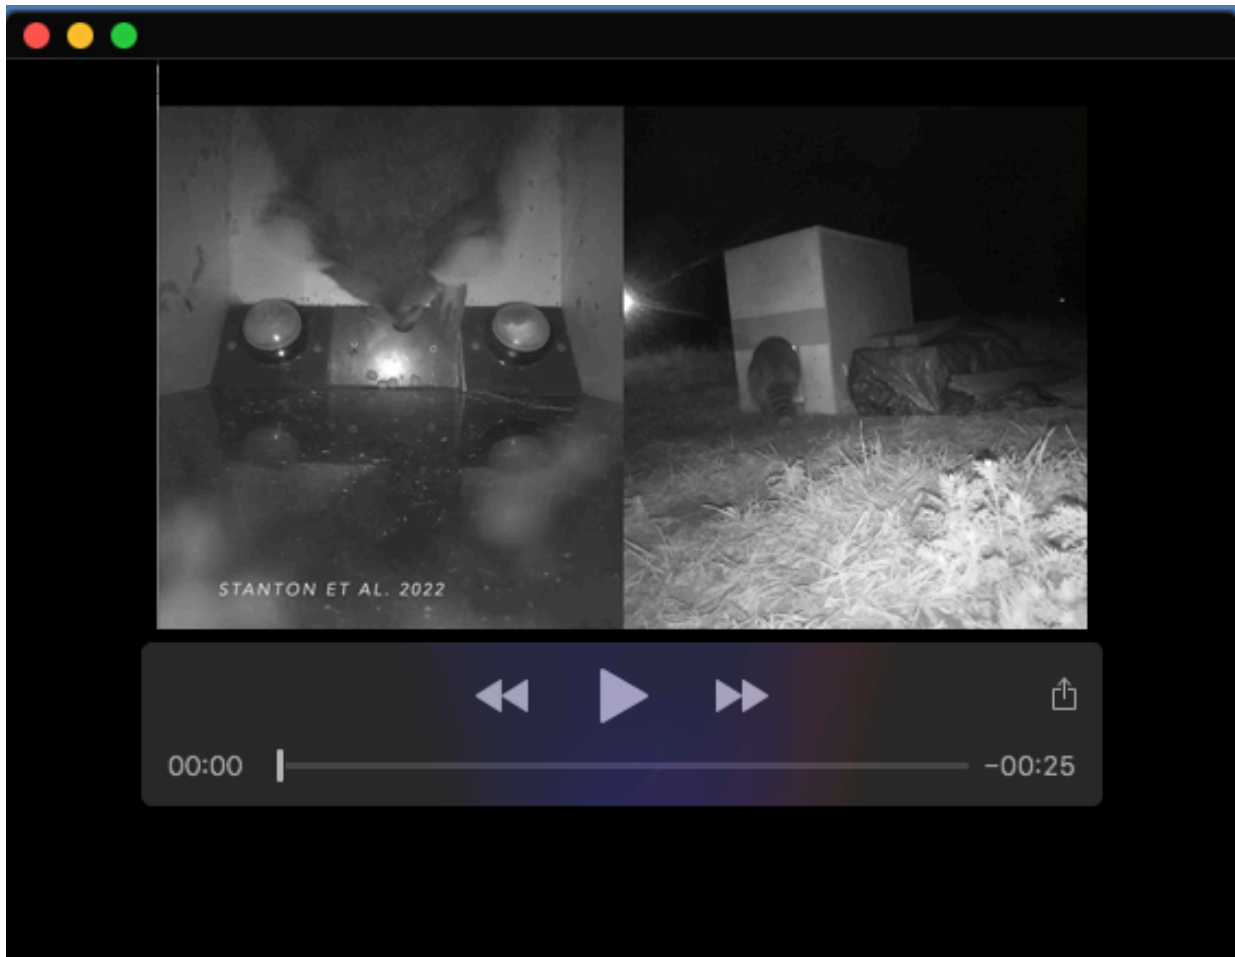

**Movie 1.** Video footage from a testing session. As seen in the video, a raccoon is eating dog kibble (i.e., the food reward) inside of the testing device and then moves outside of the device to investigate his surroundings. He then moves back inside of the device and pushes on the button to his left, which is the incorrect choice. In response, a low-pitched sound is played as the lights in both LED buttons shut off and the device becomes unresponsive for two seconds. After the two second time-out period has passed, the raccoon makes the correct selection by pushing on the button to his right side and a small amount of dog kibble is released.

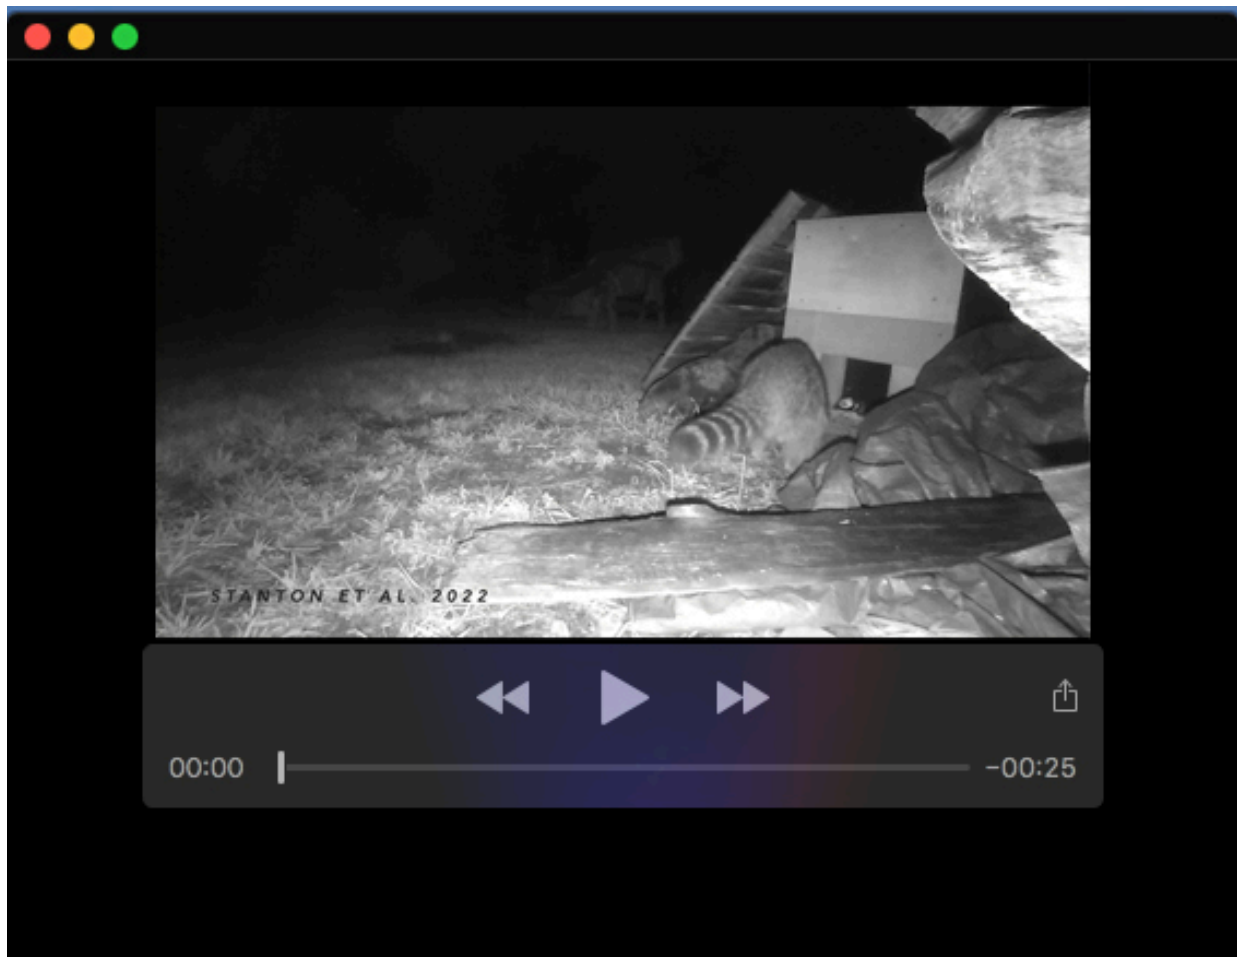

**Movie 2.** Video footage illustrating the process of habituation to the testing device. As the raccoon approaches the testing device, her PIT tag is detected, and the device automatically releases a food reward. The raccoon reacts by swiftly moving away from the device, but after a moment she returns to collect the food reward. Upon detection of her PIT tag again, the device releases a second food reward. This time the raccoon reacts by flinching at the sound of the device activating, but does not move away from the device as she did before. Finally, the device releases a third reward and although the raccoon flinches again, it appears less than her previous reaction.

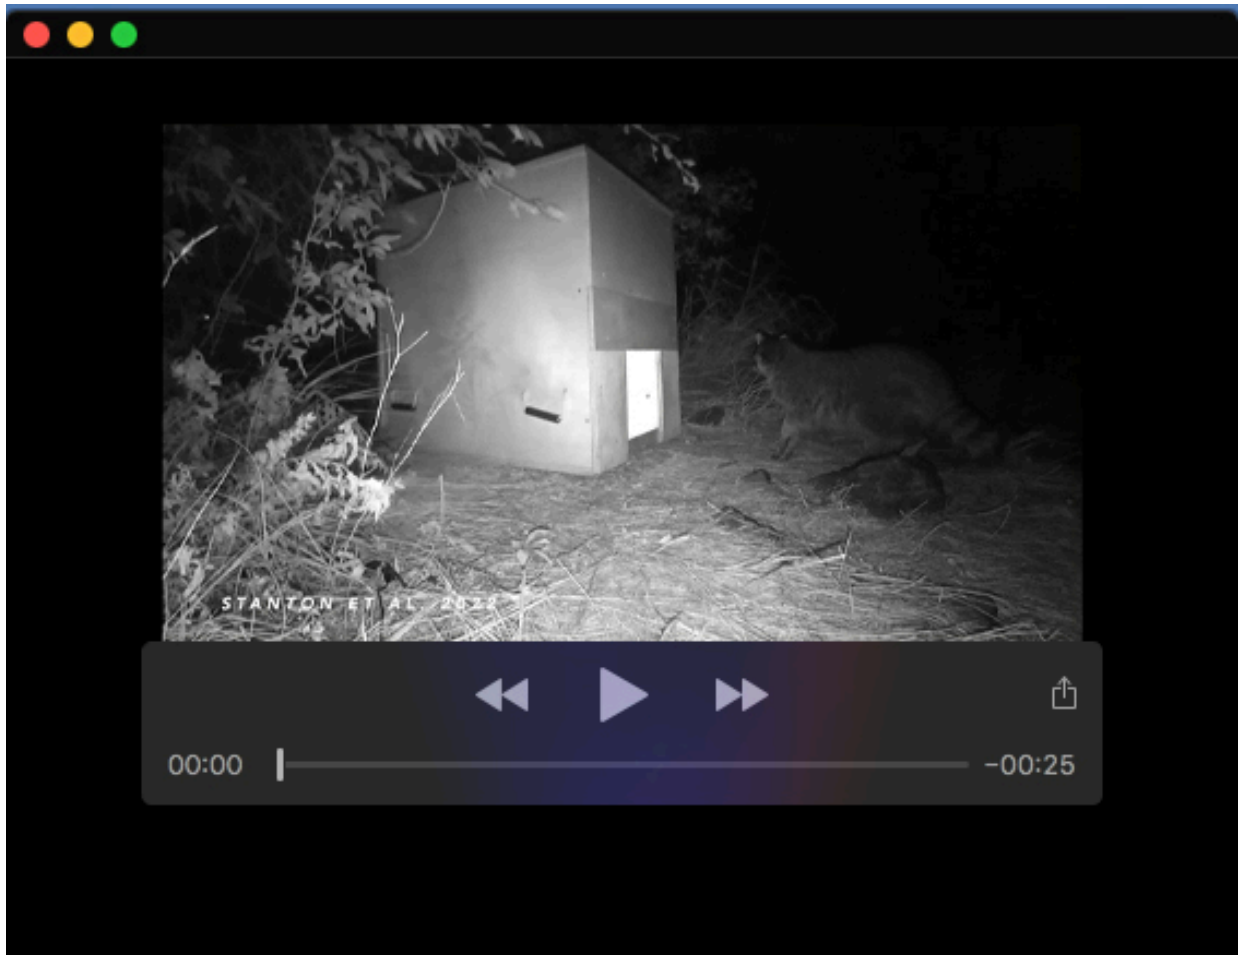

**Movie 3.** An example of a raccoon that never habituates to the testing device. The raccoon is seen approaching the device for the first (and only) time. When his PIT tag is detected, the device activates and releases a food reward. In response, the raccoon runs away and is not detected again by a testing device for the remainder of the study.ud
